# Supplementary material for: An Aptamer-Based Biosensor for Direct, Label-Free Detection of Melamine in Raw Milk
Source: PubMed Central journal article supplement (PMC6210019; doi:10.3390/s18103227), 2018-09-25
Supplement: sensors-18-03227-s001.pdf [file sensors-18-03227-s001.pdf]

Supplementary Figure 2

Color represents the length of the block sequences for aptamer. A0, A3, A4, A5, and A6 mean the lengths of aptamer block sequences for no block sequence, 3, 4, 5, and 6, respectively. The dotted diagonal line represents that the S/N ratio is equal to 1.

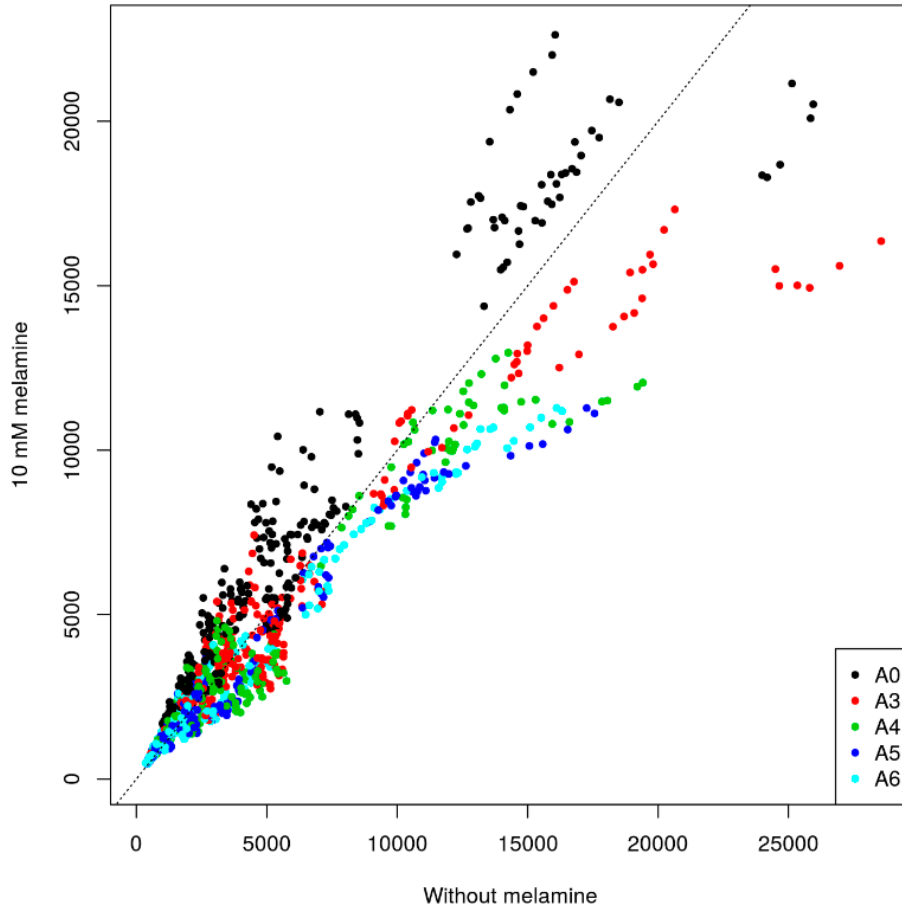

Figure S2. The relation of signal intensity between no-melamine and 10 mM melamine.

## Supplementary Figure 3

The protocol of experimental analysis is shown as follows. DNA solution (20 pmol of DNAzyme in 25  $\mu$ L of 2x DNAzyme buffer [100 mM Tris-HCl and 0.1% [w/v] Triton X-100, pH 7.4]) was denatured for 5 min, at 95  $^{\circ}$ C. The solution was then cooled down, slowly, to the room temperature, for proper structure of the biosensor. Hemin in DMSO and KCl (final concentration of 200 nM and 20 mM, respectively) were added, and filled up to 20  $\mu$ L with the DNAzyme buffer. Raw milk of 25  $\mu$ L was diluted with distilled water (final concentration: 0, 0.0001, 0.001, 0.01, 0.1, 1, 10% raw milk), it was added and incubated for 15 min, at room temperature. Next, 2.5  $\mu$ L of L-012 as a luminol derivative (final concentration of 25  $\mu$ M) and 2.5  $\mu$ L of H<sub>2</sub>O<sub>2</sub> (final concentration of 25  $\mu$ M) were injected into the DNA solution. The chemiluminescent reaction was measured immediately by the TECAN infinite 200 reader from the TECAN.

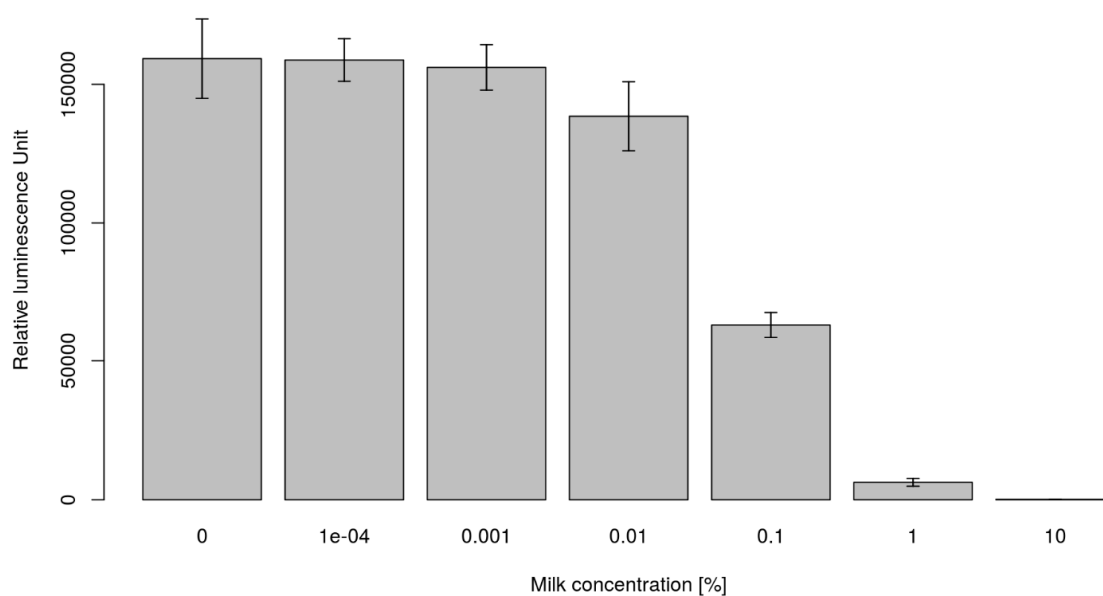

**Figure S3.** The relation between the chemiluminescence intensity and the concentration of milk.
